# Supplementary material for: Spontaneous Non-Sustained Ventricular Tachycardia and Premature Ventricular Contractions and Their Prognostic Relevance in Patients with Cancer in Routine Care
Source: MDPI journal article supplement (doi:10.3390/cancers13102303), 2021-05-12
Supplement: s1 [file s1]

## Supplementary Materials

# Spontaneous Non-Sustained Ventricular Tachycardia and Premature Ventricular Contractions and Their Prognostic Relevance in Patients with Cancer in Routine Care

Annemarie Albrecht, Jan Porthun, Jan Eucker, Andrew J. S. Coats, Stephan von Haehling, Antonio Pezzutto, Mahir Karakas, Hanno Riess, Ulrich Keller, Ulf Landmesser, Wilhelm Haverkamp, Stefan D. Anker and Markus S. Anker

**Table S1.** Kind of Cancer Patients ( $n = 261$ ).

| Group                                        | Type of Cancer                                                 | No. of Patients<br>( $n=261$ )<br>$n, (\%)$ | Solid Cancer or Haematological Malignancy |
|----------------------------------------------|----------------------------------------------------------------|---------------------------------------------|-------------------------------------------|
| Group 1—Gastrointestinal cancer ( $n = 31$ ) | Rectal cancer                                                  | 4 (2)                                       | Solid cancer                              |
|                                              | Colon cancer                                                   | 12 (5)                                      | Solid cancer                              |
|                                              | Duodenal cancer                                                | 1 (<1)                                      | Solid cancer                              |
|                                              | Pancreatic cancer                                              | 2 (1)                                       | Solid cancer                              |
|                                              | Gastric cancer                                                 | 4 (2)                                       | Solid cancer                              |
|                                              | Esophageal cancer                                              | 6 (2)                                       | Solid cancer                              |
| Group 2—Lung cancer ( $n = 21$ )             | Cholangiocellular carcinoma                                    | 12 (5)                                      | Solid cancer                              |
|                                              | Non-small-cell-lung-cancer                                     | 15 (6)                                      | Solid cancer                              |
|                                              | Small-cell-lung-cancer                                         | 6 (2)                                       | Solid cancer                              |
| Group 3—Gynaecologic cancer ( $n = 35$ )     | Cervical- / Ovarian- / Uterine cancer                          | 12 (5)                                      | Solid cancer                              |
|                                              | Breast cancer                                                  | 23 (9)                                      | Solid cancer                              |
| Group 4—Other solid cancers ( $n = 42$ )     | Tonsillar / Laryngeal / Oro- / Epi- / Hypopharyngeal carcinoma | 15 (6)                                      | Solid cancer                              |
|                                              | Urothelial carcinoma                                           | 6 (2)                                       | Solid cancer                              |
|                                              | Kidney cell carcinoma                                          | 2 (1)                                       | Solid cancer                              |
|                                              | Prostate carcinoma                                             | 7 (3)                                       | Solid cancer                              |
|                                              | Sarcoma                                                        | 4 (2)                                       | Solid cancer                              |
|                                              | Choroid melanoma                                               | 5 (2)                                       | Solid cancer                              |
|                                              | Thyroid cancer                                                 | 1 (<1)                                      | Solid cancer                              |
|                                              | Thymus carcinoma                                               | 1 (<1)                                      | Solid cancer                              |
|                                              | Peritoneal Mesothelioma                                        | 1 (<1)                                      | Solid cancer                              |
| Group 5—Leukaemia ( $n = 19$ )               | Chronic myeloid leukemia                                       | 1 (<1)                                      | Haematological malignancy                 |
|                                              | Acute myeloid leukemia                                         | 11 (4)                                      | Haematological malignancy                 |
|                                              | Myeloproliferative neoplasia                                   | 3 (1)                                       | Haematological malignancy                 |
|                                              | Myelodysplastic syndromes                                      | 3 (1)                                       | Haematological malignancy                 |
|                                              | Acute lymphocytic leukemia                                     | 1 (<1)                                      | Haematological malignancy                 |
| Group 6—Lymphoma ( $n = 113$ )               | B-cell-Non-Hodgkin-lymphoma                                    | 82 (31)                                     | Haematological malignancy                 |
|                                              | T-cell-Non-Hodgkin-lymphoma                                    | 5 (2)                                       | Haematological malignancy                 |
|                                              | Hodgkin-lymphoma                                               | 10 (4)                                      | Haematological malignancy                 |
|                                              | Multiple myeloma                                               | 16 (6)                                      | Haematological malignancy                 |

**Table S2.** Baseline Medication.

| Variable                                       | Healthy Controls<br>(n = 35) | Cancer Patients<br>(n = 261) | p-Value           | Cancer Deaths<br>(n = 158) | Cancer Survivors<br>(n = 103) | p-Value       |
|------------------------------------------------|------------------------------|------------------------------|-------------------|----------------------------|-------------------------------|---------------|
| Aspirin, n (%)                                 | 2 (6)                        | 63 (24)                      | 0.07              | 39 (25)                    | 24 (23)                       | 0.80          |
| Angiotensin-converting enzyme inhibitor, n (%) | 2 (6)                        | 57 (22)                      | 0.11              | 40 (25)                    | 17 (17)                       | 0.09          |
| Calcium channel blocker, n (%)                 | 0                            | 37 (14)                      | <b>0.0025</b>     | 20 (13)                    | 17 (17)                       | 0.38          |
| Angiotensin II receptor blocker, n (%)         | 0                            | 36 (14)                      | <b>0.0028</b>     | 16 (10)                    | 20 (19)                       | <b>0.033</b>  |
| Beta-blocker, n (%)                            | 5 (14)                       | 117 (45)                     | <b>0.0001</b>     | 74 (47)                    | 43 (42)                       | 0.42          |
| Spironolactone, n (%)                          | 0                            | 7 (3)                        | 0.23              | 5 (3)                      | 2 (2)                         | 0.61          |
| Diuretics, n (%)                               | 0                            | 71 (27)                      | <b>&lt;0.0001</b> | 45 (28)                    | 26 (25)                       | 0.57          |
| Anticoagulants, n (%)                          | 1 (3)                        | 93 (36)                      | <b>0.0002</b>     | 61 (39)                    | 32 (31)                       | 0.21          |
| Antidiabetics or Insulin, n (%)                | 0                            | 28 (11)                      | <b>0.0099</b>     | 17 (11)                    | 11 (11)                       | 0.98          |
| Proton pump inhibitors, n (%)                  | 1 (3)                        | 167 (64)                     | <b>&lt;0.0001</b> | 98 (62)                    | 69 (67)                       | 0.41          |
| Opioids, n (%)                                 | 0                            | 46 (18)                      | <b>0.0006</b>     | 32 (20)                    | 14 (14)                       | 0.17          |
| Antidepressants, n (%)                         | 0                            | 23 (9)                       | <b>0.021</b>      | 19 (12)                    | 4 (4)                         | <b>0.013</b>  |
| Corticosteroids, n (%)                         | 0                            | 73 (28)                      | <b>&lt;0.0001</b> | 51 (32)                    | 22 (21)                       | 0.055         |
| Prior chemotherapy, n (%)                      | –                            | 199 (76)                     | –                 | 127 (80)                   | 72 (70)                       | 0.052         |
| Prior immunotherapy, n (%)                     | –                            | 125 (48)                     | –                 | 75 (47)                    | 50 (49)                       | 0.87          |
| Alkylating agents, n (%)                       | –                            | 113 (43)                     | –                 | 64 (41)                    | 49 (48)                       | 0.26          |
| Platins, n (%)                                 | –                            | 74 (28)                      | –                 | 56 (35)                    | 18 (17)                       | <b>0.0016</b> |
| Anti-metabolites, n (%)                        | –                            | 98 (38)                      | –                 | 64 (41)                    | 34 (33)                       | 0.22          |
| Topoisomerase inhibitors, n (%)                | –                            | 47 (18)                      | –                 | 28 (18)                    | 19 (18)                       | 0.88          |
| Antracyclines, n (%)                           | –                            | 79 (30)                      | –                 | 45 (28)                    | 34 (33)                       | 0.44          |
| Antimitotics, n (%)                            | –                            | 60 (23)                      | –                 | 30 (19)                    | 30 (29)                       | 0.06          |
| Taxanes, n (%)                                 | –                            | 30 (11)                      | –                 | 24 (15)                    | 6 (6)                         | <b>0.020</b>  |
| Histone deacetylase inhibitors, n (%)          | –                            | 1 (<1)                       | –                 | 0                          | 1 (1)                         | 0.34          |
| Antibodies/ Immunotherapy, n (%)               | –                            | 105 (40)                     | –                 | 63 (40)                    | 42 (41)                       | 0.88          |
| Thyrosin kinase inhibitors, n (%)              | –                            | 13 (5)                       | –                 | 11 (7)                     | 2 (2)                         | <b>0.043</b>  |
| Other kinase inhibitors, n (%)                 | –                            | 3 (1)                        | –                 | 3 (2)                      | 0                             | 0.77          |
| Proteasom inhibitors, n (%)                    | –                            | 17 (7)                       | –                 | 9 (6)                      | 8 (8)                         | 0.51          |
| Other chemotherapeutic agents, n (%)           | –                            | 16 (6)                       | –                 | 11 (7)                     | 5 (5)                         | 0.51          |

Significant p-values ( $p < 0.05$ ) are bold.

**Table S3.** Prior Chemotherapy, Immunotherapy and Targeted Therapy.

| Variables                                   | All Cancer Patients<br><i>n</i> = 261 | GI Cancer<br><i>n</i> = 31 | Lung Cancer<br><i>n</i> = 21 | Gynaecologic Cancer<br><i>n</i> = 35 | Other solid Cancers<br><i>n</i> = 42 | Leukaemia<br><i>n</i> = 19 | Lymphoma<br><i>n</i> = 113 |
|---------------------------------------------|---------------------------------------|----------------------------|------------------------------|--------------------------------------|--------------------------------------|----------------------------|----------------------------|
| Alkylating agents, <i>n</i>                 | 113                                   | 0                          | 1                            | 13                                   | 2                                    | 4                          | 93                         |
| Cyclophosphamide, <i>n</i> *                | 77                                    | 0                          | 1                            | 10                                   | 0                                    | 2                          | 64                         |
| Ifosfamide, <i>n</i> *                      | 15                                    | 0                          | 0                            | 0                                    | 1                                    | 0                          | 14                         |
| Melphalan, <i>n</i>                         | 14                                    | 0                          | 1                            | 0                                    | 0                                    | 0                          | 13                         |
| Temozolomide, <i>n</i>                      | 1                                     | 0                          | 0                            | 0                                    | 1                                    | 0                          | 0                          |
| Dacarbazine, <i>n</i>                       | 6                                     | 0                          | 0                            | 0                                    | 0                                    | 0                          | 6                          |
| Procarbazine, <i>n</i>                      | 3                                     | 0                          | 0                            | 0                                    | 0                                    | 0                          | 3                          |
| Carmustine, <i>n</i>                        | 7                                     | 0                          | 0                            | 0                                    | 0                                    | 0                          | 7                          |
| Chlorambucil, <i>n</i>                      | 3                                     | 0                          | 0                            | 0                                    | 0                                    | 0                          | 3                          |
| Thiotepa, <i>n</i>                          | 3                                     | 0                          | 0                            | 0                                    | 0                                    | 0                          | 3                          |
| Treosulfan, <i>n</i>                        | 3                                     | 0                          | 0                            | 3                                    | 0                                    | 0                          | 0                          |
| Busulfan, <i>n</i>                          | 2                                     | 0                          | 0                            | 0                                    | 0                                    | 2                          | 0                          |
| Bendamustine, <i>n</i>                      | 24                                    | 0                          | 0                            | 0                                    | 0                                    | 0                          | 24                         |
| Platins, <i>n</i>                           | 74                                    | 18                         | 16                           | 13                                   | 15                                   | 1                          | 11                         |
| Carboplatin, <i>n</i>                       | 26                                    | 1                          | 8                            | 12                                   | 2                                    | 0                          | 2                          |
| Cisplatin, <i>n</i> *                       | 40                                    | 4                          | 7                            | 4                                    | 13                                   | 1                          | 11                         |
| Oxaliplatin, <i>n</i>                       | 13                                    | 12                         | 0                            | 0                                    | 0                                    | 0                          | 1                          |
| Anti-metabolites, <i>n</i>                  | 98                                    | 22                         | 8                            | 8                                    | 9                                    | 10                         | 41                         |
| High-dose Methotrexate, <i>n</i>            | 24                                    | 0                          | 0                            | 0                                    | 1                                    | 1                          | 22                         |
| Fluorouracil, <i>n</i>                      | 27                                    | 18                         | 0                            | 2                                    | 6                                    | 0                          | 1                          |
| Pemetrexed, <i>n</i>                        | 1                                     | 0                          | 0                            | 0                                    | 1                                    | 0                          | 0                          |
| Tioguanine, <i>n</i>                        | 1                                     | 0                          | 1                            | 0                                    | 0                                    | 0                          | 0                          |
| Capecitabine, <i>n</i>                      | 13                                    | 7                          | 1                            | 5                                    | 0                                    | 0                          | 0                          |
| Gemcitabine, <i>n</i>                       | 18                                    | 1                          | 7                            | 4                                    | 1                                    | 1                          | 4                          |
| Fludarabine, <i>n</i>                       | 7                                     | 0                          | 0                            | 0                                    | 0                                    | 4                          | 3                          |
| Trifluridine/Tipiracil, <i>n</i>            | 1                                     | 1                          | 0                            | 0                                    | 0                                    | 0                          | 0                          |
| Clofarabine, <i>n</i> *                     | 0                                     | 0                          | 0                            | 0                                    | 0                                    | 0                          | 0                          |
| Cytarabine, <i>n</i>                        | 32                                    | 0                          | 1                            | 0                                    | 0                                    | 9                          | 22                         |
| Topoisomerase inhibitors, <i>n</i>          | 47                                    | 8                          | 8                            | 1                                    | 2                                    | 3                          | 25                         |
| Irinotecan, <i>n</i>                        | 8                                     | 8                          | 0                            | 0                                    | 0                                    | 0                          | 0                          |
| Topotecan, <i>n</i>                         | 3                                     | 0                          | 1                            | 1                                    | 0                                    | 0                          | 1                          |
| Mitoxantrone, <i>n</i>                      | 5                                     | 0                          | 0                            | 0                                    | 0                                    | 3                          | 2                          |
| Pixantrone, <i>n</i>                        | 6                                     | 0                          | 0                            | 0                                    | 0                                    | 0                          | 6                          |
| Etoposide, <i>n</i>                         | 29                                    | 1                          | 8                            | 0                                    | 2                                    | 0                          | 18                         |
| Antracyclines, <i>n</i>                     | 79                                    | 0                          | 1                            | 13                                   | 3                                    | 7                          | 55                         |
| Doxorubicin / Adriamycin, <i>n</i> *        | 70                                    | 0                          | 1                            | 9                                    | 3                                    | 3                          | 54                         |
| Pegylated liposomal Doxorubicin, <i>n</i> * | 3                                     | 0                          | 0                            | 3                                    | 0                                    | 0                          | 0                          |
| Daunorubicin, <i>n</i> *                    | 5                                     | 0                          | 1                            | 0                                    | 0                                    | 3                          | 1                          |
| Epirubicin, <i>n</i> *                      | 5                                     | 0                          | 0                            | 4                                    | 1                                    | 0                          | 0                          |
| Idarubicin, <i>n</i> *                      | 3                                     | 0                          | 0                            | 0                                    | 0                                    | 2                          | 1                          |
| Antimitotics, <i>n</i>                      | 60                                    | 0                          | 1                            | 2                                    | 1                                    | 2                          | 54                         |
| Vincristine, <i>n</i>                       | 54                                    | 0                          | 0                            | 0                                    | 1                                    | 2                          | 51                         |
| Vinorelbine, <i>n</i>                       | 3                                     | 0                          | 1                            | 1                                    | 0                                    | 0                          | 1                          |
| Vinblastine, <i>n</i>                       | 6                                     | 0                          | 0                            | 0                                    | 0                                    | 0                          | 6                          |
| Taxanes, <i>n</i>                           | 30                                    | 5                          | 2                            | 18                                   | 5                                    | 0                          | 0                          |
| Docetaxel, <i>n</i> *                       | 11                                    | 4                          | 0                            | 3                                    | 4                                    | 0                          | 0                          |
| Eribulin, <i>n</i>                          | 3                                     | 0                          | 0                            | 3                                    | 0                                    | 0                          | 0                          |
| Paclitaxel, <i>n</i> *                      | 19                                    | 1                          | 2                            | 15                                   | 1                                    | 0                          | 0                          |
| Protein-bound paclitaxel, <i>n</i> *        | 1                                     | 0                          | 0                            | 1                                    | 0                                    | 0                          | 0                          |
| Histone deacetylase inhibitor, <i>n</i>     | 1                                     | 0                          | 0                            | 0                                    | 0                                    | 0                          | 1                          |
| Belinostat, <i>n</i>                        | 1                                     | 0                          | 0                            | 0                                    | 0                                    | 0                          | 1                          |
| Antibodies/ Immunotherapy, <i>n</i>         | 105                                   | 5                          | 6                            | 9                                    | 10                                   | 1                          | 74                         |

|                                                 |    |   |   |   |   |   |    |
|-------------------------------------------------|----|---|---|---|---|---|----|
| Alemtuzumab, <i>n</i>                           | 1  | 0 | 0 | 0 | 0 | 0 | 1  |
| Bevacizumab, <i>n</i> *                         | 10 | 3 | 0 | 6 | 0 | 0 | 1  |
| Brentuximab, <i>n</i>                           | 7  | 0 | 0 | 0 | 0 | 0 | 7  |
| Cetuximab, <i>n</i>                             | 13 | 4 | 0 | 0 | 9 | 0 | 0  |
| Daratumumab, <i>n</i>                           | 1  | 0 | 0 | 0 | 0 | 0 | 1  |
| Isatuximab, <i>n</i>                            | 1  | 0 | 0 | 0 | 0 | 0 | 1  |
| Nivolumab, <i>n</i>                             | 6  | 0 | 4 | 0 | 1 | 0 | 1  |
| Olaratumab, <i>n</i>                            | 1  | 0 | 0 | 0 | 1 | 0 | 0  |
| Panitumumab, <i>n</i>                           | 1  | 1 | 0 | 0 | 0 | 0 | 0  |
| Pertuzumab, <i>n</i> *                          | 1  | 0 | 0 | 1 | 0 | 0 | 0  |
| Pembrolizumab, <i>n</i>                         | 2  | 0 | 1 | 1 | 0 | 0 | 0  |
| Rituximab, <i>n</i>                             | 71 | 0 | 0 | 0 | 0 | 1 | 70 |
| Tomuzotuximab, <i>n</i>                         | 1  | 0 | 0 | 0 | 1 | 0 | 0  |
| Ofatumumab, <i>n</i>                            | 1  | 0 | 0 | 0 | 0 | 0 | 1  |
| Trastuzumab, <i>n</i> *                         | 2  | 0 | 0 | 2 | 0 | 0 | 0  |
| Programmed death-ligand<br>1-Antibody, <i>n</i> | 1  | 0 | 1 | 0 | 0 | 0 | 0  |
| Thyrosin kinase inhibitors,<br><i>n</i>         | 13 | 1 | 2 | 1 | 3 | 1 | 5  |
| Afatinib, <i>n</i> *                            | 2  | 0 | 2 | 0 | 0 | 0 | 0  |
| Axitinib, <i>n</i> *                            | 0  | 0 | 0 | 0 | 0 | 0 | 0  |
| Ibrutinib, <i>n</i> *                           | 5  | 0 | 0 | 0 | 0 | 0 | 5  |
| Imatinib, <i>n</i> *                            | 1  | 0 | 0 | 0 | 0 | 1 | 0  |
| Osimertinib, <i>n</i> *                         | 2  | 0 | 2 | 0 | 0 | 0 | 0  |
| Pazopanib, <i>n</i> *                           | 1  | 0 | 0 | 0 | 1 | 0 | 0  |
| Sunitinib, <i>n</i> *                           | 1  | 0 | 0 | 0 | 1 | 0 | 0  |
| Sorafenib, <i>n</i> *                           | 2  | 0 | 0 | 0 | 2 | 0 | 0  |
| Nilotinib, <i>n</i> *                           | 1  | 0 | 0 | 0 | 0 | 1 | 0  |
| Lapatinib, <i>n</i> *                           | 1  | 0 | 0 | 1 | 0 | 0 | 0  |
| Regorafenib, <i>n</i> *                         | 1  | 1 | 0 | 0 | 0 | 0 | 0  |
| Other Kinase inhibitors, <i>n</i>               | 3  | 0 | 0 | 1 | 0 | 0 | 2  |
| Idelalisib, <i>n</i>                            | 2  | 0 | 0 | 0 | 0 | 0 | 2  |
| Palbociclib, <i>n</i>                           | 0  | 0 | 0 | 0 | 0 | 0 | 0  |
| Ribociclib, <i>n</i>                            | 1  | 0 | 0 | 1 | 0 | 0 | 0  |
| Proteasom inhibitors, <i>n</i>                  | 17 | 0 | 1 | 0 | 0 | 0 | 16 |
| Bortezomib, <i>n</i> *                          | 17 | 0 | 1 | 0 | 0 | 0 | 16 |
| Ixazomib, <i>n</i>                              | 1  | 0 | 0 | 0 | 0 | 0 | 1  |
| Other chemotherapeutic<br>agents, <i>n</i>      | 16 | 0 | 0 | 0 | 4 | 1 | 11 |
| Tretinoin (ATRA), <i>n</i>                      | 1  | 0 | 0 | 0 | 0 | 1 | 0  |
| Everolimus, <i>n</i> *                          | 1  | 0 | 0 | 0 | 1 | 0 | 0  |
| Temsirolimus, <i>n</i> *                        | 3  | 0 | 0 | 0 | 0 | 0 | 3  |
| Mitomycin, <i>n</i>                             | 4  | 0 | 0 | 0 | 3 | 0 | 1  |
| Bleomycin, <i>n</i>                             | 4  | 0 | 0 | 0 | 0 | 0 | 4  |
| Venetoclax, <i>n</i>                            | 1  | 0 | 0 | 0 | 0 | 0 | 1  |
| Lenalidomide, <i>n</i>                          | 2  | 0 | 0 | 0 | 0 | 0 | 2  |
| Pomalidomide, <i>n</i>                          | 1  | 0 | 0 | 0 | 0 | 0 | 1  |
| Romidepsin, <i>n</i>                            | 1  | 0 | 0 | 0 | 0 | 0 | 1  |
| Azacitidine, <i>n</i>                           | 1  | 0 | 0 | 0 | 0 | 1 | 0  |

GI, gastrointestinal. \* anti-cancer drugs that may cause left ventricular dysfunction (according to the “2016 ESC Position Paper on cancer treatments and cardiovascular toxicity” – Zamorano et al. EHJ. 2016).

**Table S4.** Association of NSVT  $\geq 4$  Beats &  $\geq 100$  bpm with Relevant Variables in all Cancer Patients (n = 261).

| Variable                                               | No NSVT $\geq 4$ Beats & $\geq 100$ bpm<br>(n = 236) | NSVT $\geq 4$ Beats & $\geq 100$ bpm<br>(n = 25) | p-value       |
|--------------------------------------------------------|------------------------------------------------------|--------------------------------------------------|---------------|
| Clinical characteristics                               |                                                      |                                                  |               |
| Age (year)                                             | 67 $\pm$ 12                                          | 65 $\pm$ 13                                      | 0.30          |
| Female sex, n (%)                                      | 123 (52)                                             | 9 (36)                                           | 0.13          |
| BMI (kg/m <sup>2</sup> )                               | 25 $\pm$ 5                                           | 26 $\pm$ 7                                       | 0.26          |
| Cancer stage $\geq$ III, n (%)                         | 166 (70)                                             | 22 (88)                                          | 0.33          |
| Cancer type: solid, n (%)                              | 116 (49)                                             | 13 (52)                                          | 0.74          |
| ECOG performance status $\geq 2$ , n (%)               | 100 (42)                                             | 11 (44)                                          | 0.88          |
| Prior potentially cardiotoxic anti-cancer drugs, n (%) | 147 (62)                                             | 15 (60)                                          | 0.82          |
| Left ventricular ejection fraction (%)                 | 65 $\pm$ 7 (n=163)                                   | 63 $\pm$ 10 (n=18)                               | 0.41          |
| Laboratory parameters                                  |                                                      |                                                  |               |
| Haemoglobin (g/dL)                                     | 10.9 $\pm$ 2.0                                       | 10.4 $\pm$ 1.9                                   | 0.33          |
| Leucocytes (/nL)                                       | 6.3 (4.4 – 9.7)                                      | 6.9 (3.9 – 9.5)                                  | 0.97          |
| Platelets (/nL)                                        | 228 $\pm$ 170                                        | 204 $\pm$ 117                                    | 0.50          |
| Sodium (mmol/L)                                        | 139 $\pm$ 4                                          | 138 $\pm$ 3                                      | 0.64          |
| Potassium (mmol/L)                                     | 3.9 $\pm$ 0.5                                        | 3.9 $\pm$ 0.5                                    | 0.99          |
| Creatinine (mg/dL)                                     | 0.98 $\pm$ 0.53                                      | 1.16 $\pm$ 1.01                                  | 0.15          |
| GOT (U/L)                                              | 26 (19 – 36) (n=161)                                 | 33 (23 – 66) (n=10)                              | 0.27          |
| Secondary diagnoses                                    |                                                      |                                                  |               |
| Arterial hypertension, n (%)                           | 119 (50)                                             | 13 (52)                                          | 0.88          |
| Coronary artery disease, n (%)                         | 27 (11)                                              | 7 (28)                                           | <b>0.019</b>  |
| Atrial fibrillation, n (%)                             | 12 (5)                                               | 2 (8)                                            | 0.91          |
| Previous myocardial infarction, n (%)                  | 16 (7)                                               | 4 (16)                                           | 0.61          |
| Diabetes mellitus type 2, n (%)                        | 46 (19)                                              | 4 (16)                                           | 0.92          |
| Chronic kidney disease, n (%)                          | 38 (16)                                              | 3 (12)                                           | 0.89          |
| Previous stroke, n (%)                                 | 26 (11)                                              | 1 (4)                                            | 0.52          |
| Current use of antibiotics, n (%)                      | 42 (18)                                              | 3 (12)                                           | 0.79          |
| Medication at study entry                              |                                                      |                                                  |               |
| Aspirin, n (%)                                         | 56 (24)                                              | 7 (28)                                           | 0.64          |
| Angiotensin-converting enzyme inhibitor, n (%)         | 46 (19)                                              | 11 (44)                                          | <b>0.0048</b> |
| Calcium channel blocker, n (%)                         | 33 (14)                                              | 4 (16)                                           | 0.93          |
| Angiotensin II receptor blocker, n (%)                 | 33 (14)                                              | 3 (12)                                           | 0.93          |
| Beta-blocker, n (%)                                    | 107 (45)                                             | 10 (40)                                          | 0.61          |
| Spirolactone, n (%)                                    | 5 (2)                                                | 2 (8)                                            | 0.64          |
| Diuretics, n (%)                                       | 66 (28)                                              | 5 (20)                                           | 0.39          |
| Anticoagulants, n (%)                                  | 82 (35)                                              | 11 (44)                                          | 0.36          |
| Antidiabetics or Insulin, n (%)                        | 27 (11)                                              | 1 (4)                                            | 0.52          |
| Proton pump inhibitors, n (%)                          | 152 (64)                                             | 15 (60)                                          | 0.66          |
| Opioids, n (%)                                         | 44 (19)                                              | 2 (8)                                            | 0.44          |
| Antidepressants, n (%)                                 | 21 (9)                                               | 2 (8)                                            | 0.97          |
| Corticosteroids, n (%)                                 | 69 (29)                                              | 4 (16)                                           | 0.52          |
| Anti-cancer therapy                                    |                                                      |                                                  |               |
| Prior chemotherapy, n (%)                              | 178 (75)                                             | 21 (84)                                          | 0.62          |
| Prior immunotherapy, n (%)                             | 116 (49)                                             | 9 (36)                                           | 0.21          |
| Alkylating agents, n (%)                               | 103 (44)                                             | 10 (40)                                          | 0.73          |
| Platins, n (%)                                         | 67 (28)                                              | 7 (28)                                           | 0.97          |
| Anti-metabolites, n (%)                                | 90 (38)                                              | 8 (32)                                           | 0.55          |
| Topoisomerase inhibitors, n (%)                        | 42 (18)                                              | 5 (20)                                           | 0.79          |
| Antracyclines, n (%)                                   | 72 (31)                                              | 7 (28)                                           | 0.80          |
| Antimitotics, n (%)                                    | 55 (23)                                              | 5 (20)                                           | 0.71          |
| Taxanes, n (%)                                         | 28 (12)                                              | 2 (8)                                            | 0.89          |
| Histone deacetylase inhibitor, n (%)                   | 1 (<1)                                               | 0                                                | 0.76          |
| Antibodies/ Immunotherapy, n (%)                       | 96 (41)                                              | 9 (36)                                           | 0.65          |
| Thyrosin kinase inhibitors, n (%)                      | 13 (6)                                               | 0                                                | 0.14          |
| Other kinase inhibitors, n (%)                         | 3 (1)                                                | 0                                                | 0.52          |
| Proteasom inhibitor, n (%)                             | 16 (7)                                               | 1 (4)                                            | 0.89          |
| Other chemotherapeutic agents, n (%)                   | 13 (6)                                               | 3 (12)                                           | 0.75          |
| 24h-ECG                                                |                                                      |                                                  |               |
| Average 24h heart rate (bpm)                           | 78 $\pm$ 13                                          | 85 $\pm$ 20                                      | <b>0.016</b>  |
| No. of premature atrial contraction / 24h              | 185 (27 – 1028)                                      | 690 (51 – 2073)                                  | 0.09          |

|                                                            |              |                  |               |
|------------------------------------------------------------|--------------|------------------|---------------|
| No. of premature ventricular contraction / 24h             | 20 (2 – 279) | 439 (114 – 3263) | <b>0.0001</b> |
| ≥20 Premature ventricular contractions / 24h, <i>n</i> (%) | 118 (50)     | 21 (84)          | 0.09          |
| ≥50 Premature ventricular contractions / 24h, <i>n</i> (%) | 97 (41)      | 20 (80)          | <b>0.0002</b> |

Values are means ± SD or *n* (%). 24h, 24 hours; BMI, body mass index; ECOG, Eastern Cooperative Oncology Group; bpm, beats per minute; GOT, glutamic oxaloacetic transaminase; no., number; NSVT, non-sustained ventricular tachycardia. *P*-values are determined using the unpaired *t*-test.

**Table S5.** Association of <20 PVC & ≥20 PVC with Relevant Variables in all Cancer Patients (*n* = 261).

| Variable                                                      | <20 PVC<br>( <i>n</i> = 122) | ≥20 PVC<br>( <i>n</i> = 139) | <i>p</i> -Value |
|---------------------------------------------------------------|------------------------------|------------------------------|-----------------|
| Clinical characteristics                                      |                              |                              |                 |
| Age (year)                                                    | 65 ± 13                      | 70 ± 11                      | <b>0.0018</b>   |
| Female sex, <i>n</i> (%)                                      | 73 (60)                      | 59 (42)                      | <b>0.0051</b>   |
| BMI (kg/m <sup>2</sup> )                                      | 21 ± 5                       | 25 ± 5                       | 0.94            |
| Cancer stage ≥III, <i>n</i> (%)                               | 93 (76)                      | 95 (68)                      | 0.16            |
| Cancer type: solid, <i>n</i> (%)                              | 61 (50)                      | 68 (49)                      | 0.86            |
| ECOG performance status ≥2, <i>n</i> (%)                      | 56 (46)                      | 55 (40)                      | 0.30            |
| Prior potentially cardiotoxic anti-cancer drugs, <i>n</i> (%) | 71 (58)                      | 91 (65)                      | 0.23            |
| Left ventricular ejection fraction (%)                        | 65 ± 7 ( <i>n</i> =89)       | 64 ± 8 ( <i>n</i> =92)       | 0.38            |
| Laboratory parameters                                         |                              |                              |                 |
| Haemoglobin (g/dL)                                            | 10.9 ± 2.1                   | 10.7 ± 2.0                   | 0.52            |
| Leucocytes (/nL)                                              | 6.1 (4.3 – 9.1)              | 6.8 (4.4–9.6)                | 0.36            |
| Platelets (/nL)                                               | 218 ± 121                    | 232 ± 197                    | 0.52            |
| Sodium (mmol/L)                                               | 139 ± 4                      | 139 ± 4                      | 0.86            |
| Potassium (mmol/L)                                            | 3.9 ± 0.5                    | 4.0 ± 0.6                    | 0.12            |
| Creatinine (mg/dL)                                            | 1.01 ± 0.66                  | 0.99 ± 0.52                  | 0.83            |
| GOT (U/L)                                                     | 24 (18–36) ( <i>n</i> =83)   | 28 (20–37) ( <i>n</i> =88)   | 0.12            |
| Secondary diagnoses                                           |                              |                              |                 |
| Arterial hypertension, <i>n</i> (%)                           | 55 (45)                      | 87 (63)                      | <b>0.0046</b>   |
| Coronary artery disease, <i>n</i> (%)                         | 8 (7)                        | 26 (19)                      | <b>0.0036</b>   |
| Atrial fibrillation, <i>n</i> (%)                             | 4 (3)                        | 10 (7)                       | 0.17            |
| Previous myocardial infarction, <i>n</i> (%)                  | 4 (3)                        | 16 (12)                      | <b>0.010</b>    |
| Diabetes mellitus type 2, <i>n</i> (%)                        | 22 (18)                      | 28 (20)                      | 0.67            |
| Chronic kidney disease, <i>n</i> (%)                          | 15 (12)                      | 26 (19)                      | 0.16            |
| Previous stroke, <i>n</i> (%)                                 | 13 (11)                      | 14 (10)                      | 0.88            |
| Current use of antibiotics, <i>n</i> (%)                      | 19 (16)                      | 26 (19)                      | 0.50            |
| Medication at study entry                                     |                              |                              |                 |
| Aspirin, <i>n</i> (%)                                         | 27 (22)                      | 36 (26)                      | 0.48            |
| Angiotensin-converting enzyme inhibitor, <i>n</i> (%)         | 20 (16)                      | 37 (27)                      | <b>0.046</b>    |
| Calcium channel blocker, <i>n</i> (%)                         | 18 (15)                      | 19 (14)                      | 0.80            |
| Angiotensin II receptor blocker, <i>n</i> (%)                 | 12 (10)                      | 24 (17)                      | 0.08            |
| Beta-blocker, <i>n</i> (%)                                    | 53 (43)                      | 64 (46)                      | 0.67            |
| Spironolactone, <i>n</i> (%)                                  | 3 (2)                        | 4 (3)                        | 0.85            |
| Diuretics, <i>n</i> (%)                                       | 32 (26)                      | 39 (28)                      | 0.74            |
| Anticoagulants, <i>n</i> (%)                                  | 39 (32)                      | 54 (39)                      | 0.25            |
| Antidiabetics or Insulin, <i>n</i> (%)                        | 17 (14)                      | 11 (8)                       | 0.12            |
| Proton pump inhibitors, <i>n</i> (%)                          | 80 (66)                      | 87 (63)                      | 0.62            |
| Opioids, <i>n</i> (%)                                         | 19 (16)                      | 27 (19)                      | 0.42            |
| Antidepressants, <i>n</i> (%)                                 | 13 (11)                      | 10 (7)                       | 0.32            |
| Corticosteroids, <i>n</i> (%)                                 | 34 (28)                      | 39 (28)                      | 0.97            |
| Anti-cancer therapy                                           |                              |                              |                 |
| Prior chemotherapy, <i>n</i> (%)                              | 87 (71)                      | 112 (81)                     | 0.08            |
| Prior immunotherapy, <i>n</i> (%)                             | 59 (48)                      | 66 (47)                      | 0.89            |
| Alkylating agents, <i>n</i> (%)                               | 48 (39)                      | 65 (47)                      | <b>0.021</b>    |
| Platins, <i>n</i> (%)                                         | 37 (30)                      | 37 (27)                      | 0.56            |
| Anti-metabolites, <i>n</i> (%)                                | 47 (39)                      | 51 (37)                      | 0.56            |
| Topoisomerase inhibitors, <i>n</i> (%)                        | 26 (21)                      | 21 (15)                      | 0.38            |
| Antracyclines, <i>n</i> (%)                                   | 35 (29)                      | 44 (32)                      | 0.60            |
| Antimitotics, <i>n</i> (%)                                    | 28 (23)                      | 32 (23)                      | 0.31            |
| Taxanes, <i>n</i> (%)                                         | 12 (10)                      | 18 (13)                      | 0.39            |
| Histone deacetylase inhibitor, <i>n</i> (%)                   | 0                            | 1 (1)                        | 0.46            |
| Antibodies/ Immunotherapy, <i>n</i> (%)                       | 53 (43)                      | 52 (37)                      | 0.27            |

|                                                |             |                |                   |
|------------------------------------------------|-------------|----------------|-------------------|
| Thyrosin kinase inhibitors, <i>n</i> (%)       | 9 (7)       | 4 (3)          | 0.12              |
| Other kinase inhibitors, <i>n</i> (%)          | 3 (2)       | 0              | 0.09              |
| Proteasom inhobitors, <i>n</i> (%)             | 6 (5)       | 11 (8)         | 0.71              |
| Other chemotherapeutic agents, <i>n</i> (%)    | 6 (5)       | 10 (7)         | 0.95              |
| <b>24h-ECG</b>                                 |             |                |                   |
| Average 24h heart rate (bpm)                   | 77 ± 15     | 80 ± 13        | <b>0.042</b>      |
| No. of premature atrial contraction / 24h      | 53 (20–353) | 543 (100–2287) | <b>&lt;0.0001</b> |
| No. of premature ventricular contraction / 24h | 2 (0–7)     | 297 (87–1312)  | <b>&lt;0.0001</b> |
| NSVT ≥4 beats & ≥100 bpm, <i>n</i> (%)         | 4 (3)       | 21 (15)        | <b>&lt;0.0001</b> |
| NSVT ≥6 beats & ≥100 bpm, <i>n</i> (%)         | 2 (2)       | 10 (7)         | <b>0.028</b>      |

Values are means ± SD or *n* (%). 24h, 24 hours; BMI, body mass index; ECOG, Eastern Cooperative Oncology Group; bpm, beats per minute; GOT, glutamic oxaloacetic transaminase; no., number; NSVT, non-sustained ventricular tachycardia. Significant *p*-values (*p* < 0.05) are bold.
